# Supplementary material
Source: MDPI journal article supplement (https://www.mdpi.com/2073-4352/2/2/675)
Supplement: s1 [file s1]

data_fx372

_publ_contact_author_name       'Thomas M. Klapo\"tke'
_publ_contact_author_address
;
Department Chemie
Ludwig-Maximilians Universit\"at
Butenandtstra\&se 5-13 (Haus D)
D-81377 M\"unchen
Bundesrepublik Deutschland
;

_publ_author_name
;
Fischer, Niko
Klap\"otke, Thomas M.
Lux, K.
Martin, Franz. A.
Stierstorfer, Joerg
;

_publ_author_address
;
Fischer, N.
Department Chemie
Ludwig-Maximilians Universit\"at
Butenandtstrasse 5-13 (Haus D)
D-81377 M\"unchen
Bundesrepublik Deutschland

Lux, K.
Department Chemie
Ludwig-Maximilians Universit\"at
Butenandtstrasse 5-13 (Haus D)
D-81377 M\"unchen
Bundesrepublik Deutschland

Martin, F. A.
Department Chemie
Ludwig-Maximilians Universit\"at
Butenandtstrasse 5-13 (Haus D)
D-81377 M\"unchen
Bundesrepublik Deutschland

Klapoetke, T. M.
Department Chemie
Ludwig-Maximilians Universit\"at
Butenandtstrasse 5-13 (Haus D)
D-81377 M\"unchen
Bundesrepublik Deutschland

Stierstorfer, J.
Department Chemie
Ludwig-Maximilians Universit\"at
Butenandtstrasse 5-13 (Haus D)
D-81377 M\"unchen
Bundesrepublik Deutschland
;

_publ_contact_author_email 'tmk@cup.uni-muenchen.de'
_publ_contact_author_fax   '+49-89-2180-77491'
_publ_contact_author_phone '+49-89-2180-77492'

_publ_requested_journal  'Crystals'
_publ_section_title
;
Inorganic Amino-Nitro-Guanidinium (ANQ) Derivatives
;

_publ_section_abstract  ?
_publ_section_comment   ?

_audit_author_name                'Joerg Stierstorfer'
_audit_block_code                 ?
_audit_creation_method 
;
CrysAlisPro, Oxford Diffraction Ltd.,
Version 1.171.35.11 (release 16-05-2011 CrysAlis171 .NET)
(compiled May 16 2011,17:55:39)
;
_audit_creation_date 
;
'Fri Apr 13 14:30:20 2012'
;
_audit_update_record              ?

_chemical_name_systematic         'aminonitroguanidinium bromide monohydrate'
_chemical_compound_source         ?
_chemical_name_common             'aminonitroguanidinium bromide monohydrate'
_chemical_formula_moiety          'C H6 N5 O2, Br, H2 O '
_chemical_formula_sum 
 'C H8 Br N5 O3'
_chemical_formula_weight          218.03


_cell_length_a                    8.0261(5)
_cell_length_b                    12.7412(7)
_cell_length_c                    7.9296(5)
_cell_angle_alpha                 90.00
_cell_angle_beta                  118.051(9)
_cell_angle_gamma                 90.00
_cell_volume                      715.64(10)
_cell_formula_units_Z             4
_cell_measurement_temperature     173(2)
_cell_measurement_reflns_used   1218
_cell_measurement_theta_min     4.3174
_cell_measurement_theta_max     33.5895
_cell_special_details             ?

_exptl_crystal_description        plate
_exptl_crystal_colour             colorless
_exptl_crystal_size_max           0.50
_exptl_crystal_size_mid           0.21
_exptl_crystal_size_min           0.04
_exptl_crystal_density_meas       ?
_exptl_crystal_density_diffrn     2.024
_exptl_crystal_density_method     'not measured'
_exptl_crystal_F_000              432
_exptl_absorpt_coefficient_mu     5.708
_exptl_absorpt_correction_type            'multi-scan'
_exptl_absorpt_correction_T_min   0.1625
_exptl_absorpt_correction_T_max   0.8038
_exptl_absorpt_process_details 
;
CrysAlisPro, Agilent Technologies,
Version 1.171.35.11 (release 16-05-2011 CrysAlis171 .NET)
(compiled May 16 2011,17:55:39)
Empirical absorption correction using spherical harmonics,
 implemented in SCALE3 ABSPACK scaling algorithm.
;

_diffrn_ambient_temperature       173 # in K
_diffrn_source_type               'Spellman generator'
_diffrn_source_power              ? # in kW
_diffrn_source_voltage            50 # kV
_diffrn_source_current            40 # mA
_diffrn_radiation_wavelength      0.71073
_diffrn_radiation_source          'Enhance (Mo) X-ray Source'
_diffrn_radiation_monochromator   'graphite'
_diffrn_radiation_collimation     0.5
_diffrn_measurement_device        'CCD camera on \k-goniostat'
_diffrn_measurement_device_type   'Xcalibur, Sapphire3'
_diffrn_measurement_method        '\w scans'
_diffrn_radiation_type 'Mo K\a'
_diffrn_detector_area_resol_mean 15.9809

_diffrn_reflns_number             3576
_diffrn_reflns_av_R_equivalents   0.0474
_diffrn_reflns_av_sigmaI/netI     0.0596
_diffrn_reflns_limit_h_min        -9
_diffrn_reflns_limit_h_max        9
_diffrn_reflns_limit_k_min        -15
_diffrn_reflns_limit_k_max        10
_diffrn_reflns_limit_l_min        -9
_diffrn_reflns_limit_l_max        9
_diffrn_reflns_theta_min          4.33
_diffrn_reflns_theta_max          25.99
_diffrn_measured_fraction_theta_max    0.996
_diffrn_reflns_theta_full              25.99
_diffrn_measured_fraction_theta_full   0.996

_reflns_number_total              1395
_reflns_number_gt                 1182
_reflns_threshold_expression      >2sigma(I)

_diffrn_orient_matrix_UB_11      -0.0723651000
_diffrn_orient_matrix_UB_12       0.0358905000
_diffrn_orient_matrix_UB_13      -0.0121617000
_diffrn_orient_matrix_UB_21       0.0600658000
_diffrn_orient_matrix_UB_22       0.0424957000
_diffrn_orient_matrix_UB_23       0.0071723000
_diffrn_orient_matrix_UB_31      -0.0344767000
_diffrn_orient_matrix_UB_32      -0.0013090000
_diffrn_orient_matrix_UB_33      -0.1003768000

_symmetry_cell_setting monoclinic
_symmetry_space_group_name_H-M 'P 21/c'
_symmetry_Int_Tables_number       ?
_symmetry_space_group_name_Hall   '-P 2ybc'

loop_
 _atom_type_symbol
 _atom_type_description
 _atom_type_scat_dispersion_real
 _atom_type_scat_dispersion_imag
 _atom_type_scat_source
'C'  'C'   0.0033   0.0016
'International Tables Vol C Tables 4.2.6.8 and 6.1.1.4'
'Br'  'Br'  -0.2901   2.4595
'International Tables Vol C Tables 4.2.6.8 and 6.1.1.4'
'N'  'N'   0.0061   0.0033
'International Tables Vol C Tables 4.2.6.8 and 6.1.1.4'
'O'  'O'   0.0106   0.0060
'International Tables Vol C Tables 4.2.6.8 and 6.1.1.4'
'H'  'H'   0.0000   0.0000
'International Tables Vol C Tables 4.2.6.8 and 6.1.1.4'


loop_
 _symmetry_equiv_pos_as_xyz
'x, y, z'
'-x, y+1/2, -z+1/2'
'-x, -y, -z'
'x, -y-1/2, z-1/2'

_exptl_special_details            ?


loop_
 _exptl_crystal_face_index_h
 _exptl_crystal_face_index_k
 _exptl_crystal_face_index_l
 _exptl_crystal_face_perp_dist
? ? ? ?

_diffrn_special_details           ?

_refine_diff_density_max    0.681
_refine_diff_density_min   -0.772
_refine_diff_density_rms    0.117

_refine_ls_weighting_details 
 'calc w=1/[\s^2^(Fo^2^)+(0.0225P)^2^+0.0000P] where P=(Fo^2^+2Fc^2^)/3'


_computing_data_collection 
;
CrysAlisPro, Agilent Technologies,
Version 1.171.35.11 (release 16-05-2011 CrysAlis171 .NET)
(compiled May 16 2011,17:55:39)
;
_computing_cell_refinement 
;
CrysAlisPro, Agilent Technologies,
Version 1.171.35.11 (release 16-05-2011 CrysAlis171 .NET)
(compiled May 16 2011,17:55:39)
;
_computing_data_reduction 
;
CrysAlisPro, Agilent Technologies,
Version 1.171.35.11 (release 16-05-2011 CrysAlis171 .NET)
(compiled May 16 2011,17:55:39)
;
_computing_structure_solution     ?
_computing_structure_refinement   'SHELXL-97 (Sheldrick, 1997)'
_computing_molecular_graphics 
;
'ORTEP (M. N. Burnett, C. K. Johnson, ORTEP-III: Oak Ridge Thermal Ellipsoid
# Plot Program for Crystal Structure Illustrations, Oak Ridge National
# Laboratory Report ORNL-6895, 1996). Windows version (L. J. Farrugia, Univ.
# Glasgow) used --- SCHAKAL (E. Keller, University of  Freiburg (Breisgau),
# Germany, 1995)'
;

_computing_publication_material 
;PLATON (A. L. Spek, Acta Crystallogr, Sect. A, 1990, 46, C34, 1995 version).
# --- T.B.Cohen, Pure Appl. Chem. 1996,68,2339-2359 (atomic masses).
;

_refine_special_details 
;
 Refinement of F^2^ against ALL reflections.  The weighted R-factor wR and
 goodness of fit S are based on F^2^, conventional R-factors R are based
 on F, with F set to zero for negative F^2^. The threshold expression of
 F^2^ > 2sigma(F^2^) is used only for calculating R-factors(gt) etc. and is
 not relevant to the choice of reflections for refinement.  R-factors based
 on F^2^ are statistically about twice as large as those based on F, and R-
 factors based on ALL data will be even larger.
;

_refine_ls_hydrogen_treatment     mixed
_atom_sites_solution_hydrogens    geom
_refine_ls_structure_factor_coef  Fsqd
_refine_ls_matrix_type            full
_refine_ls_weighting_scheme       calc
_atom_sites_solution_primary      direct
_atom_sites_solution_secondary    difmap
_refine_ls_extinction_method      none
_refine_ls_extinction_coef        ?
_refine_ls_abs_structure_details  ?
_refine_ls_abs_structure_Flack    ?
_refine_ls_number_reflns          1395
_refine_ls_number_parameters      123
_refine_ls_number_restraints      3
_refine_ls_R_factor_all           0.0411
_refine_ls_R_factor_gt            0.0325
_refine_ls_wR_factor_ref          0.0697
_refine_ls_wR_factor_gt           0.0636
_refine_ls_goodness_of_fit_ref    1.041
_refine_ls_restrained_S_all       1.041
_refine_ls_shift/su_max           0.000
_refine_ls_shift/su_mean          0.000

loop_
 _atom_site_label
 _atom_site_type_symbol
 _atom_site_fract_x
 _atom_site_fract_y
 _atom_site_fract_z
 _atom_site_U_iso_or_equiv
 _atom_site_adp_type
 _atom_site_occupancy
 _atom_site_symmetry_multiplicity
 _atom_site_calc_flag
 _atom_site_refinement_flags
 _atom_site_disorder_assembly
 _atom_site_disorder_group
O1 O 0.4448(4) 0.1577(2) 0.4894(3) 0.0240(6) Uani 1 1 d . . .
O2 O 0.6160(4) 0.1859(2) 0.7915(4) 0.0256(6) Uani 1 1 d . . .
N1 N 0.4278(4) 0.0506(2) 0.7145(4) 0.0143(6) Uani 1 1 d . . .
N2 N 0.4959(4) 0.1346(2) 0.6588(4) 0.0161(7) Uani 1 1 d . . .
N3 N 0.2292(4) -0.0886(2) 0.6449(4) 0.0150(7) Uani 1 1 d D . .
N4 N 0.3299(5) -0.1082(3) 0.8464(5) 0.0152(7) Uani 1 1 d . . .
N5 N 0.2095(4) 0.0025(3) 0.3900(4) 0.0202(7) Uani 1 1 d D . .
C1 C 0.2936(5) -0.0073(3) 0.5774(5) 0.0132(7) Uani 1 1 d . . .
Br1 Br 0.19081(5) 0.39060(3) 0.48465(5) 0.01900(14) Uani 1 1 d . . .
O3 O 0.9332(4) 0.2556(2) 0.6275(4) 0.0193(6) Uani 1 1 d . . .
H4A H 0.450(6) -0.129(3) 0.879(5) 0.012(10) Uiso 1 1 d . . .
H4C H 0.279(6) -0.165(4) 0.873(6) 0.036(13) Uiso 1 1 d . . .
H3A H 1.006(6) 0.238(3) 0.729(6) 0.026(13) Uiso 1 1 d . . .
H5A H 0.243(5) 0.055(2) 0.337(5) 0.018(10) Uiso 1 1 d D . .
H4B H 0.320(6) -0.047(3) 0.903(6) 0.027(11) Uiso 1 1 d . . .
H3B H 0.986(6) 0.287(3) 0.582(6) 0.030(14) Uiso 1 1 d . . .
H5B H 0.117(4) -0.043(2) 0.319(5) 0.029(12) Uiso 1 1 d D . .
H3 H 0.198(6) -0.1477(19) 0.577(5) 0.037(13) Uiso 1 1 d D . .

loop_
 _atom_site_aniso_label
 _atom_site_aniso_U_11
 _atom_site_aniso_U_22
 _atom_site_aniso_U_33
 _atom_site_aniso_U_23
 _atom_site_aniso_U_13
 _atom_site_aniso_U_12
O1 0.0324(15) 0.0239(15) 0.0144(13) 0.0056(12) 0.0099(12) -0.0032(13)
O2 0.0304(15) 0.0228(16) 0.0174(14) -0.0056(13) 0.0062(13) -0.0148(13)
N1 0.0168(15) 0.0133(16) 0.0134(15) 0.0000(13) 0.0075(13) -0.0033(13)
N2 0.0188(16) 0.0132(16) 0.0178(16) -0.0004(14) 0.0099(14) -0.0001(14)
N3 0.0180(16) 0.0121(17) 0.0121(15) -0.0005(14) 0.0048(14) -0.0024(14)
N4 0.0213(18) 0.0107(17) 0.0146(16) 0.0008(14) 0.0094(15) -0.0024(15)
N5 0.0207(17) 0.0235(19) 0.0110(16) -0.0006(15) 0.0028(14) -0.0061(15)
C1 0.0142(17) 0.0105(18) 0.0168(18) 0.0010(16) 0.0089(15) 0.0046(15)
Br1 0.0173(2) 0.0224(2) 0.0158(2) -0.00136(16) 0.00648(17) -0.00392(16)
O3 0.0182(14) 0.0208(16) 0.0158(15) 0.0033(13) 0.0055(13) 0.0000(13)

loop_
 _geom_bond_atom_site_label_1
 _geom_bond_atom_site_label_2
 _geom_bond_distance
 _geom_bond_site_symmetry_2
 _geom_bond_publ_flag
O1 N2 1.241(4) . ?
O2 N2 1.229(4) . ?
N1 C1 1.337(4) . ?
N1 N2 1.366(4) . ?
N3 C1 1.374(4) . ?
N3 N4 1.433(4) . ?
N3 H3 0.890(10) . ?
N4 H4A 0.91(4) . ?
N4 H4C 0.90(4) . ?
N4 H4B 0.92(4) . ?
N5 C1 1.318(4) . ?
N5 H5A 0.895(10) . ?
N5 H5B 0.896(10) . ?
O3 H3A 0.78(4) . ?
O3 H3B 0.78(4) . ?

loop_
 _geom_angle_atom_site_label_1
 _geom_angle_atom_site_label_2
 _geom_angle_atom_site_label_3
 _geom_angle
 _geom_angle_site_symmetry_1
 _geom_angle_site_symmetry_3
 _geom_angle_publ_flag
C1 N1 N2 117.5(3) . . ?
O2 N2 O1 121.8(3) . . ?
O2 N2 N1 114.3(3) . . ?
O1 N2 N1 123.8(3) . . ?
C1 N3 N4 116.6(3) . . ?
C1 N3 H3 117(3) . . ?
N4 N3 H3 112(3) . . ?
N3 N4 H4A 109(2) . . ?
N3 N4 H4C 109(3) . . ?
H4A N4 H4C 103(3) . . ?
N3 N4 H4B 105(2) . . ?
H4A N4 H4B 116(3) . . ?
H4C N4 H4B 114(4) . . ?
C1 N5 H5A 119(2) . . ?
C1 N5 H5B 119(3) . . ?
H5A N5 H5B 122(4) . . ?
N5 C1 N1 130.9(3) . . ?
N5 C1 N3 115.1(3) . . ?
N1 C1 N3 114.0(3) . . ?
H3A O3 H3B 109(4) . . ?

loop_
 _geom_torsion_atom_site_label_1
 _geom_torsion_atom_site_label_2
 _geom_torsion_atom_site_label_3
 _geom_torsion_atom_site_label_4
 _geom_torsion
 _geom_torsion_site_symmetry_1
 _geom_torsion_site_symmetry_2
 _geom_torsion_site_symmetry_3
 _geom_torsion_site_symmetry_4
 _geom_torsion_publ_flag
C1 N1 N2 O2 178.5(3) . . . . ?
C1 N1 N2 O1 -2.5(5) . . . . ?
N2 N1 C1 N5 -0.8(5) . . . . ?
N2 N1 C1 N3 -178.4(3) . . . . ?
N4 N3 C1 N5 174.0(3) . . . . ?
N4 N3 C1 N1 -8.0(4) . . . . ?

loop_
 _geom_contact_atom_site_label_1
 _geom_contact_atom_site_label_2
 _geom_contact_distance
 _geom_contact_site_symmetry_1
 _geom_contact_site_symmetry_2
 _geom_contact_publ_flag
? ? ? ? ? ?

loop_
 _geom_hbond_atom_site_label_D
 _geom_hbond_atom_site_label_H
 _geom_hbond_atom_site_label_A
 _geom_hbond_distance_DH
 _geom_hbond_distance_HA
 _geom_hbond_distance_DA
 _geom_hbond_angle_DHA
 _geom_hbond_site_symmetry_A
N4 H4A Br1  0.91(4) 2.57(4) 3.427(3) 156(3) 2_646
N4 H4C O3  0.90(4) 1.98(4) 2.815(4) 153(4) 2_646
N4 H4C O2  0.90(4) 2.40(4) 2.871(4) 113(3) 3_657
O3 H3A Br1  0.78(4) 2.48(5) 3.203(3) 156(4) 4_666
N5 H5A O1  0.895(10) 1.99(3) 2.588(4) 123(3) .
N5 H5A Br1  0.895(10) 2.71(3) 3.428(3) 138(3) 4_565
N4 H4B Br1  0.92(4) 2.47(4) 3.360(3) 163(3) 4_566
O3 H3B Br1  0.78(4) 2.50(4) 3.275(3) 172(4) 1_655
N5 H5B Br1  0.896(10) 2.654(19) 3.493(3) 156(3) 2_545
N3 H3 O3  0.890(10) 2.005(16) 2.871(4) 164(4) 3_656
N3 H3 O2  0.890(10) 2.52(4) 3.075(4) 121(3) 2_646

_geom_special_details         ?

_iucr_refine_instructions_details 
;
TITL lsg in P2(1)/c
CELL  0.71073   8.0261  12.7412   7.9296   90.000  118.051   90.000
ZERR     4.00   0.0005   0.0007   0.0005    0.000    0.009    0.000
LATT   1
SYMM  - X, 1/2 + Y, 1/2 - Z
SFAC  C    BR   N    O    H
UNIT  4    4    20   12   32
MERG   2
OMIT    -2.00  52.00
DFIX 0.90 0.01 N5 H5A N5 H5B
DFIX 0.90 0.01 N3 H3
EQIV $1 -x+1, y-1/2, -z+3/2
EQIV $2 -x+1, -y, -z+2
EQIV $3  x+1, -y+1/2, z+1/2
EQIV $4  x, -y+1/2, z-1/2
EQIV $5  x, -y+1/2, z+1/2
EQIV $6  x+1, y, z
EQIV $7  -x, y-1/2, -z+1/2
EQIV $8 -x+1, -y, -z+1
HTAB N4 Br1_$1
HTAB N4 O3_$1
HTAB N4 O2_$2
HTAB O3 Br1_$3
HTAB N5 O1
HTAB N5 Br1_$4
HTAB N4 Br1_$5
HTAB O3 Br1_$6
HTAB N5 Br1_$7
HTAB N3 O3_$8
HTAB N3 O2_$1
FMAP   2
PLAN   20
SIZE     0.04   0.21   0.50
ACTA
BOND   $H
CONF
L.S.   5
TEMP  -100.00
WGHT    0.022500
FVAR       0.64076
O1    4    0.444842    0.157653    0.489443    11.00000    0.03238    0.02394 =
         0.01437    0.00561    0.00990   -0.00323
O2    4    0.615963    0.185949    0.791476    11.00000    0.03040    0.02281 =
         0.01740   -0.00560    0.00619   -0.01479
N1    3    0.427821    0.050592    0.714535    11.00000    0.01677    0.01333 =
         0.01341    0.00003    0.00749   -0.00330
N2    3    0.495872    0.134598    0.658770    11.00000    0.01877    0.01317 =
         0.01784   -0.00039    0.00991   -0.00014
N3    3    0.229221   -0.088634    0.644919    11.00000    0.01802    0.01212 =
         0.01212   -0.00050    0.00482   -0.00235
N4    3    0.329871   -0.108232    0.846367    11.00000    0.02132    0.01074 =
         0.01460    0.00077    0.00938   -0.00241
N5    3    0.209463    0.002524    0.389953    11.00000    0.02065    0.02350 =
         0.01096   -0.00057    0.00281   -0.00610
C1    1    0.293573   -0.007332    0.577388    11.00000    0.01423    0.01055 =
         0.01685    0.00097    0.00891    0.00458
BR1   2    0.190809    0.390596    0.484652    11.00000    0.01727    0.02237 =
         0.01579   -0.00136    0.00648   -0.00392
O3    4    0.933159    0.255559    0.627491    11.00000    0.01824    0.02081 =
         0.01581    0.00327    0.00548    0.00001
H4A   5    0.449871   -0.129477    0.878863    11.00000    0.01236
H4C   5    0.279330   -0.164838    0.873088    11.00000    0.03608
H3A   5    1.006041    0.237544    0.729173    11.00000    0.02624
H5A   5    0.242653    0.055161    0.337106    11.00000    0.01842
H4B   5    0.319824   -0.047227    0.903183    11.00000    0.02658
H3B   5    0.985757    0.286711    0.582105    11.00000    0.03002
H5B   5    0.117321   -0.042694    0.319377    11.00000    0.02862
H3    5    0.197675   -0.147749    0.577082    11.00000    0.03716
HKLF    4
 
REM  lsg in P2(1)/c
REM R1 =  0.0325 for   1182 Fo > 4sig(Fo)  and  0.0411 for all   1395 data
REM    123 parameters refined using      3 restraints
 
END
 
WGHT      0.0225      0.0000
REM Highest difference peak  0.681,  deepest hole -0.772,  1-sigma level  0.117
Q1    1   0.2389  0.3908  0.3804  11.00000  0.05    0.68
Q2    1   0.1460  0.3913  0.6145  11.00000  0.05    0.59
Q3    1   0.2626  0.0235  0.9265  11.00000  0.05    0.48
Q4    1   1.1263  0.3069  0.5567  11.00000  0.05    0.42
Q5    1   0.4867  0.0013  0.8158  11.00000  0.05    0.39
Q6    1   0.1200  0.4696  0.5586  11.00000  0.05    0.39
Q7    1   1.2723  0.2299  0.8419  11.00000  0.05    0.38
Q8    1   0.2450  0.2978  0.4202  11.00000  0.05    0.38
Q9    1   0.1230 -0.0442  0.6499  11.00000  0.05    0.37
Q10   1   0.8434  0.2059  0.8076  11.00000  0.05    0.37
Q11   1   0.3369  0.0591  0.7403  11.00000  0.05    0.36
Q12   1   0.6153  0.2681  0.7206  11.00000  0.05    0.35
Q13   1   0.9638  0.4012  0.5025  11.00000  0.05    0.33
Q14   1   0.3727  0.3639  0.6383  11.00000  0.05    0.33
Q15   1   0.3191 -0.0164  0.3080  11.00000  0.05    0.32
Q16   1   0.4810  0.0825  0.3759  11.00000  0.05    0.32
Q17   1   0.9839  0.2112  0.8193  11.00000  0.05    0.32
Q18   1   0.0538  0.3861  0.4854  11.00000  0.05    0.32
Q19   1   0.2651  0.4412  0.6628  11.00000  0.05    0.32
Q20   1   0.0319  0.3866  0.3216  11.00000  0.05    0.32
;
